# Supplementary material
Source: ML conference proceedings conference paper supplement (https://openreview.net/forum?id=Zap3nZhRIQ)
Supplement: supplementary_material [file attachment]

## 1 Neural Network Architecture for Figure 2

**Figure 2a - Fully connected neural networks with varying depths:** In order to examine the impact of neural network depth and activation function differentiability on convergence, we run experiments using depth  $D$  fully connected neural networks for different values of  $D$ . These networks consist of  $D - 1$  fully connected + activation blocks, concluding with a classification head.

**Figure 2b - Convolutional neural networks:** In order to validate our conclusions with more complex architectures, we performed simulations using a streamlined version of VGG16. This adapted model consists of 5 convolutional blocks, each of which includes convolution, activation, and average pooling layers. We chose average pooling instead of max pooling due to the latter's non-differentiability.
